# Supplementary material for: Recombinant Tissue Plasminogen Activator (r-tPA) Induces In-Vitro Human Neutrophil Migration via Low Density Lipoprotein Receptor-Related Protein 1 (LRP-1)
Source: MDPI journal article supplement (doi:10.3390/ijms21197014), 2020-09-23
Supplement: s1 [file s1]

## Supplementary material

# **Recombinant tissue plasminogen activator (r-TPA) induces *in-vitro* human neutrophil migration via low density lipoprotein receptor-related protein 1 (LRP-1)**

Luca Liberale<sup>1,2\*</sup>, Maria Bertolotto<sup>2\*</sup>, Silvia Minetti<sup>2</sup>, Paola Contini<sup>3</sup>, Daniela Verzola<sup>4</sup>, Pietro Ameri<sup>5,6</sup>, Giorgio Ghigliotti<sup>5,6</sup>, Aldo Pende<sup>5,7</sup>, Giovanni G. Camici<sup>1</sup>, Federico Carbone<sup>2,5</sup>, Fabrizio Montecucco<sup>2,5</sup>

<sup>1</sup> Center for Molecular Cardiology, University of Zürich, Wagistrasse 12, 8952 Schlieren, Switzerland. <sup>2</sup> First Clinic of Internal Medicine, Department of Internal Medicine, University of Genoa, 6 Viale Benedetto XV, 16132 Genoa, Italy. <sup>3</sup> Clinical Immunology, Department of Internal Medicine, University of Genoa, 6 viale Benedetto XV, 16132 Genoa, Italy. <sup>4</sup> Division of Nephrology, Dialysis and Transplantation, Department of Internal Medicine, University of Genoa, 6 Viale Benedetto XV, 16132 Genoa, Italy. <sup>5</sup> IRCCS Ospedale Policlinico San Martino Genoa – Italian Cardiovascular Network, 10 Largo Benzi, 16132, Genoa, Italy. <sup>6</sup> Laboratory of Cardiovascular Biology, IRCCS Ospedale Policlinico San Martino & Department of Internal Medicine, University of Genoa, Genoa, Italy. <sup>7</sup> Clinic of Emergency Medicine, Department of Emergency Medicine, University of Genoa, Genoa, Italy.

\* These authors equally contributed as first author.

**Running title:** r-TPA favours neutrophil migration

**Corresponding Author:** Fabrizio Montecucco, MD, PhD, First Clinic of Internal Medicine, Department of Internal Medicine, University of Genoa, 6 viale Benedetto XV, 13132 Genova. Tel: +39 010 353 8694; Fax: +39 010 353 8686; E-mail: [fabrizio.montecucco@unige.it](mailto:fabrizio.montecucco@unige.it)

# Supplementary figure 1

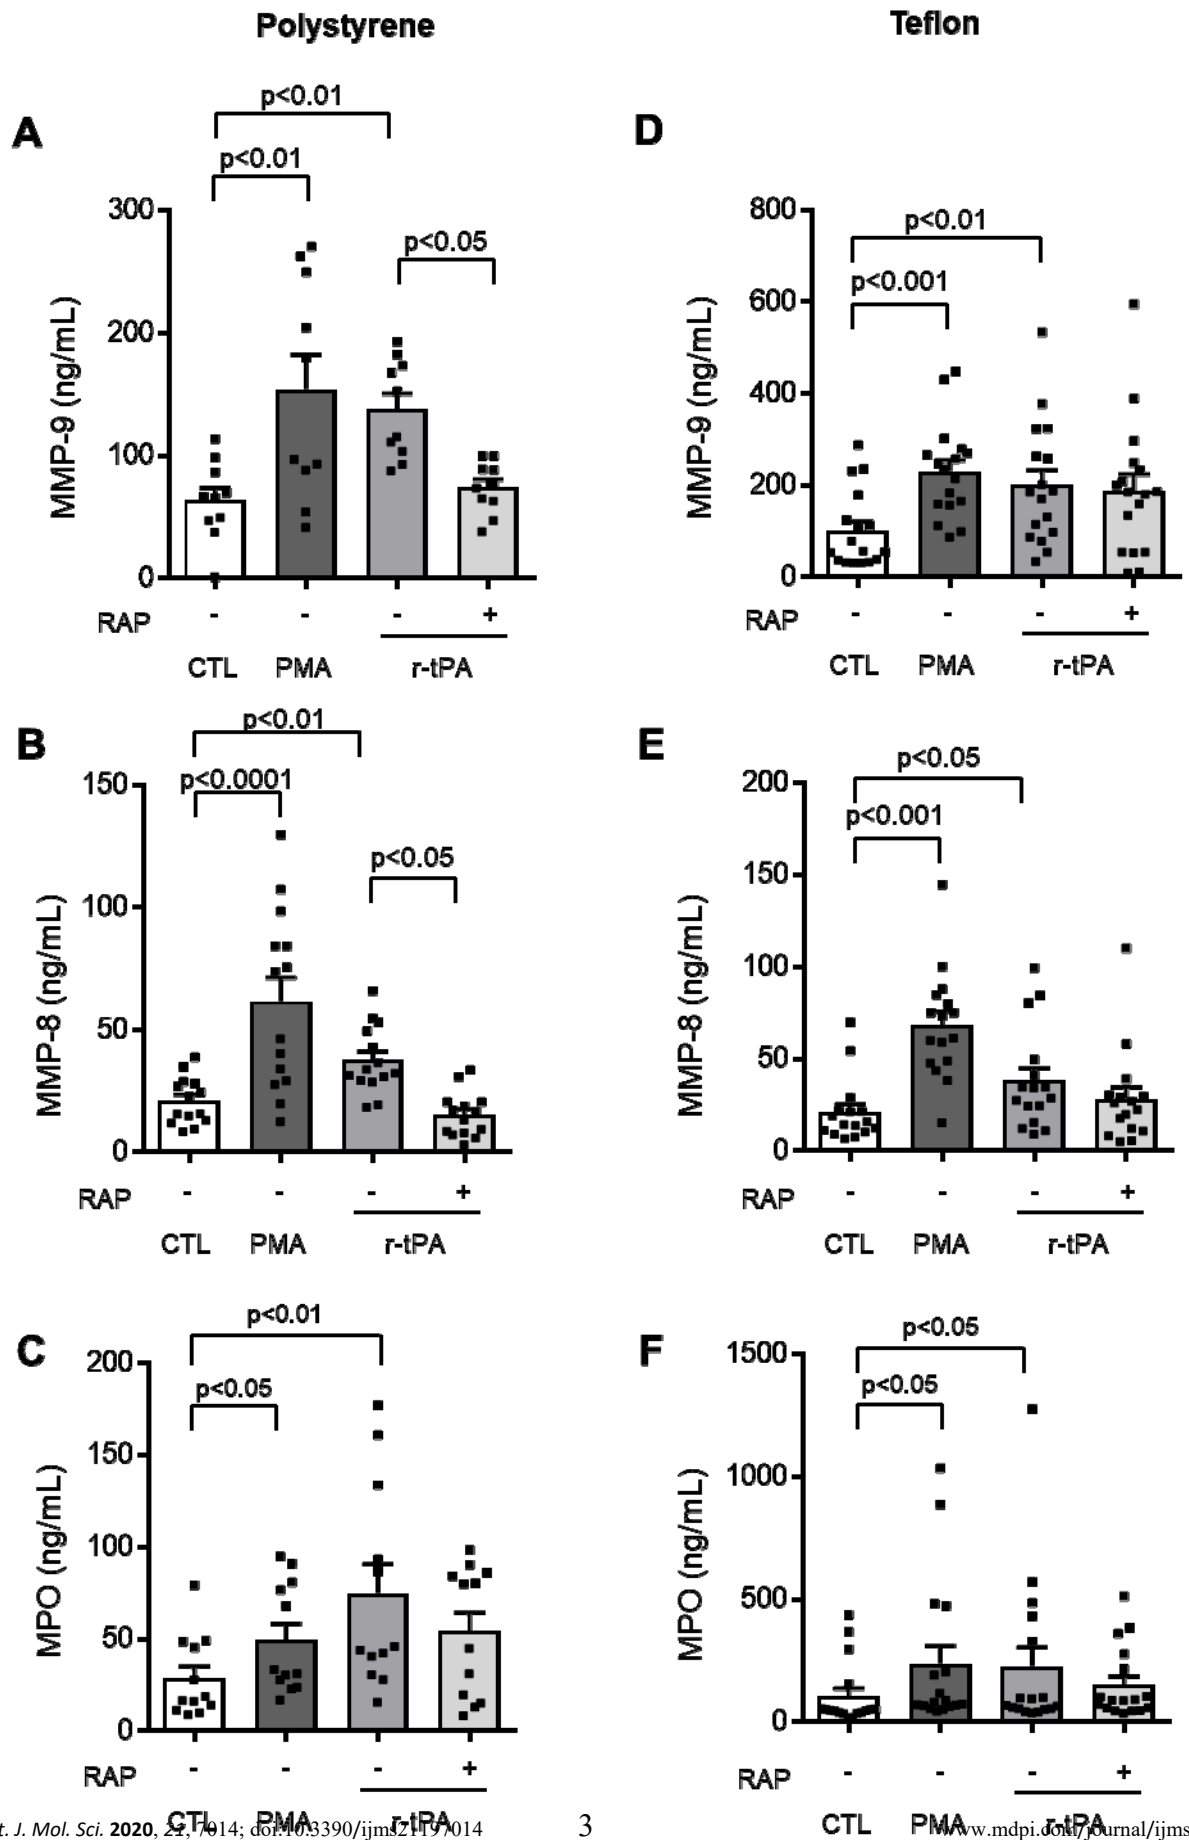

**Suppl. Figure 1: Pre-treatment with receptor-associated protein (RAP) reduces recombinant tissue plasminogen activator (r-tPA)-induced human neutrophil degranulation under adhesion conditions.** Cells under adherent (polysterene dishes, **A-C**) or suspension (Teflon™ dishes, **D-E**) were pre-treated for 1 hour with control medium (CTL) or 0.5  $\mu$ M RAP and then stimulated with 0.1 mg/mL r-tPA or 10 ng/mL phorbol myristate acetate (PMA) as positive control for 30 minutes. Degranulation products metalloproteinases (MMP)-9 (**A, D**), MMP-8 (**B, E**) and myeloperoxidase MPO (**C, F**) were quantified by ELISA in the cell supernatants. Data are expressed as mean  $\pm$  1SD, n=11-17.
